# Supplementary material for: Syntheses of two- and three-dimensional covalent organic frameworks in deep eutectic solvents
Source: Royal Society of Chemistry journal article supplement (doi:10.1039/d0gc02670k), 2020-01-01
Supplement: d0gc02670k1.pdf [file d0gc02670k1.pdf]

## Electronic Supplementary Information

### Synthesis of Two and Three-Dimensional Covalent Organic Frameworks in Deep Eutectic Solvents

Jikuan Qiu, Pengxin Guan, Yuling Zhao, Zhiyong Li, Huiyong Wang\*, and Jianji Wang\*

*Collaborative Innovation Center of Henan Province for Green Manufacturing of Fine Chemicals, Key Laboratory of Green Chemical Media and Reactions, Ministry of Education, School of Chemistry and Chemical Engineering, Henan Normal University, Xinxiang, Henan 453007, P. R. China*

*\*E-mail: jwang@htu.cn; hywang@htu.cn*

## Table of Contents

**Section S1. Materials and Methods (pages S2-**

**S5) Section S2. Figures S1-48 (pages S6-S22)**

**Section S3. Tables S1-5 (pages S23-**

**S26) Section S4. References (page S27)**

**Section S1: Materials and Methods**

All chemicals and reagents were commercially available and used without further purification. Deep eutectic solvents were synthesized according to the published procedures.<sup>1</sup> Power X-ray diffraction (PXRD) data were obtained with a Bruker D8 Advance diffractometer at 40 kV and 40 mA with Cu K $\alpha$  radiation from  $2\theta = 2^\circ$  to  $50^\circ$  in  $0.05^\circ$  increment. Fourier transform infrared (FTIR) spectra of the samples were collected on a Spectrum 400 spectrometer (Perkin-Elmer). Thermal properties of the materials were evaluated using a thermogravimetric analysis (TGA) instrument (STA449C) over the temperature range from  $25^\circ\text{C}$  to  $800^\circ\text{C}$  under  $\text{N}_2$  atmosphere with a heating rate of  $10^\circ\text{C}/\text{min}$ . Nitrogen adsorption and desorption isotherms were measured at 77 K using a ASiQwin Quantachrome instrument. The samples were treated at  $120^\circ\text{C}$  for 10 h before measurements. Specific surface areas were calculated from the adsorption data using Brunauer-Emmett-Teller (BET) methods. Pore size distribution data were calculated based on the nonlocal density functional theory (NLDFT) model. Field emission scanning electron microscopy (SEM) observations were performed on a Hitachi SU8010 microscope operated at an accelerating voltage of 10.0kV.

### ***General procedures for the synthesis of Deep Eutectic Solvents***

Three kinds of DESs were prepared using choline chloride as hydrogen bond acceptor (HBA), while the hydrogen bond donors (HBD) were glycerol (Gly), ethylene glycol (EG) and urea (U). All the DESs were prepared by simply mixing HBA and HBD under stirring, and then reacted at  $80^\circ\text{C}$  for 0.5h until a uniform and stable liquid was formed. The molar ratio of HBA to HBD) was approximately 1:2. After the reaction was finished, the mixture was collected without further purification and then dried at  $60^\circ\text{C}$  under vacuum for 24 h to give a color-less liquid. The synthesized DESs were named ChCl/Gly, ChCl/EG and ChCl/U, respectively.

### ***Synthesis of TpPa-Gly in ChCl-Gly***

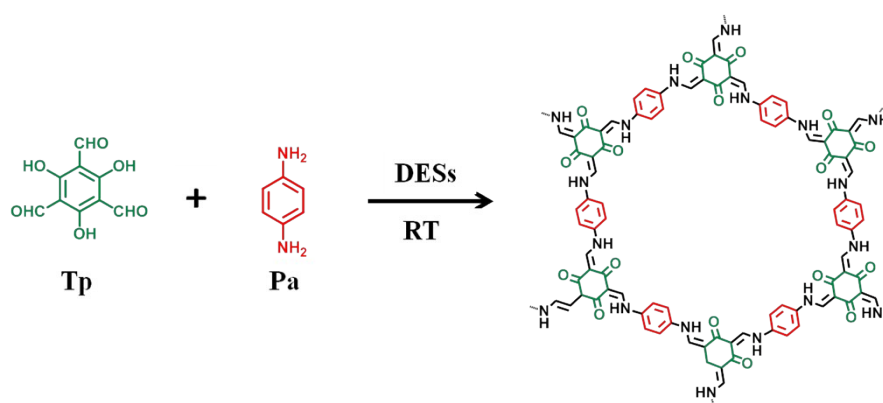

In a plastic centrifuge tube with the volume of 5.0 ml, 1,3,5-triformylphloroglucinol (Tp) (0.10 mmol, 21.0mg) and p-phenylenediamine (Pa) (0.15mmol, 16.2mg) were dissolved

in ChCl/Gly DES (7.6 eqv. 200uL) under vigorous stirring. The mixture was kept at room temperature for 2h. The precipitate was isolated by filtration and washed with ethanol (15mL×2). The collected powders were refluxed with DMF (10mL) for 8 h to remove any un-reacted residuals, then washed with ethanol (20mL×3) and acetone (20mL×3), and dried under vacuum at 100 °C for 12 h to give a red colored powder (yield of 91%). TpPa-EG and TpPa-U were synthesized in similar procedures.

### ***Bulky production of TpPa-Gly under ambient conditions***

The procedure was almost the same as that mentioned above. Tp (5mmol, 1.05g) and Pa (7.5mmol, 0.81g) were weighed into a flask and suspended in ChCl/Gly (10 mL). After keeping for 24h at room temperature, the red solid was isolated by filtration and washed with ethanol (40mL×2). The collected powder was refluxed with DMF (20mL) for 8 h to remove unreacted residuals, then washed with ethanol (50mL×3) and acetone (50mL×3), evacuated in vacuum at 100 °C for 24 h to give a red colored powder. The weight of final purified TpPa-Gly was 1.6 g.

### ***Synthesis of other 2D COFs in ChCl-Gly***

Similar to the synthesis of TpPa-Gly, Tp (0.10 mmol, 21mg) and 4,4'-azodianiline (Azo) (0.15 mmol, 31.8mg) were used to produce TpAzo-Gly as deep red powders (yield of 85%); Tp (0.10 mmol, 21mg) and 2,2'-bipyridine-4,4'-diamine (Bpy) (0.15mmol, 27.9 mg) were used to yield TpBpy-Gly as yellow powders (yield of 83%); Tp (0.10 mmol, 21mg) and 2,5-dimethyl-1,4-phenylenediamine (Pa-CH<sub>3</sub>) (0.15mmol, 20.4mg) were used to afford TpPa-CH<sub>3</sub>-Gly as deep red powders (yield of 88%).

### ***Synthesis of TpHa-Gly in ChCl-Gly***

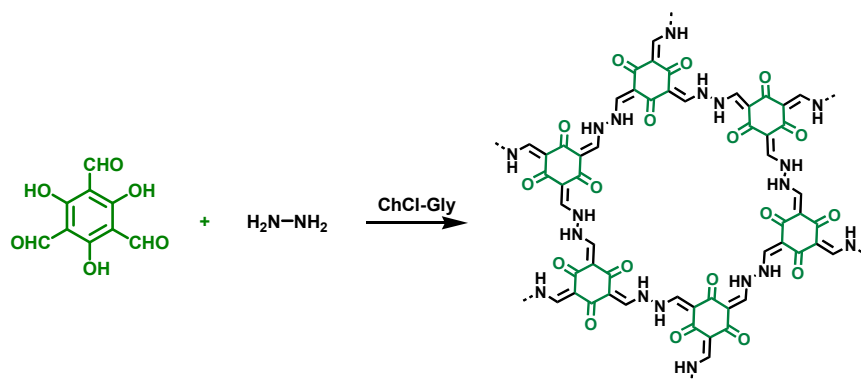

In a plastic centrifuge tube with the volume of 5.0 ml, Tp (0.10 mmol, 21.0 mg) and Ha (0.15mmol, 7.5mg) were dissolved in ChCl/Gly DES (7.6 eqv. 200 uL) under vigorous stirring. The mixture was kept at room temperature for 2h. The precipitate was isolated by filtration and washed with ethanol (15mL×2). The collected powders were refluxed

with DMF (10mL) for 8 h to remove any un-reacted residuals, then washed with ethanol (20mL×3) and acetone (20mL×3), and dried under vacuum at 100 °C for 12 h to give a red colored powder (yield of 90%).

#### ***Synthesis of TpDTPH-Gly in ChCl-Gly***

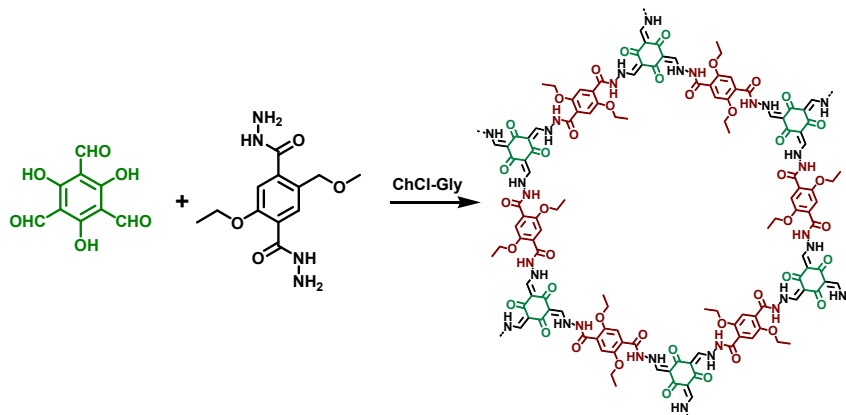

In a plastic centrifuge tube with the volume of 5.0 ml, Tp (0.10 mmol, 21.0 mg) and DTPH (0.15mmol, 42.3mg) were dissolved in ChCl/Gly DES (7.6 eqv. 200 uL) under vigorous stirring. The mixture was kept at 50 °C for 12h. The precipitate was isolated by filtration and washed with ethanol (15mL×2). The collected powders were refluxed with DMF (10mL) for 8 h to remove any un-reacted residuals, then washed with ethanol (20mL×3) and acetone (20mL×3), and dried under vacuum at 100 °C for 12 h to give a light yellow colored powder (yield of 80%).

#### ***Synthesis of 3D-COF-1 in ChCl-Gly***

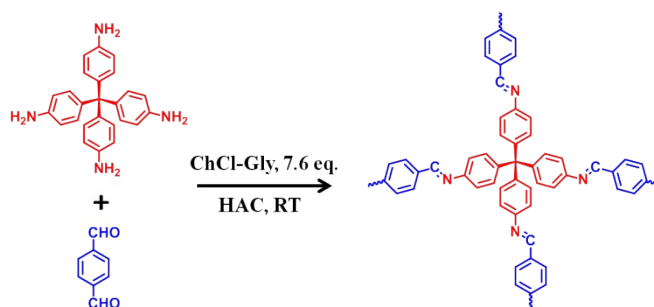

A centrifuge tube (5 mL) was charged with tetrakis(4-formylphenyl)-methane (TFPM) (21.6 mg, 0.05 mmol) and p-phenylenediamine (Pa) (10.8 mg, 0.1 mmol) in ChCl/gly (7.6 eq., 200uL) with acetic acid (6M, 8uL ) as the catalyst, followed by keeping at room temperature for 2 hours to produce crystalline solids. The obtained light yellow precipitate was isolated by filtration and washed with acetone (20mL×3) and ethanol (20mL×3). The 3D-COF-10 was obtained after drying at 100°C under vacuum for 10 h (yield of 73%).

#### ***Synthesis of 3D-COF-HNU10 in ChCl-Gly***

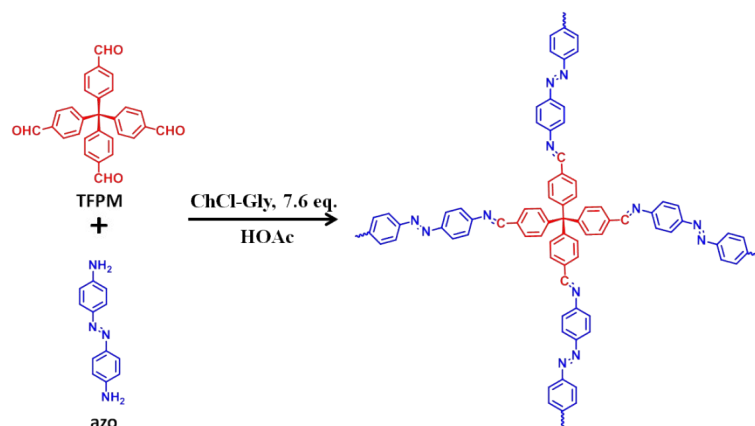

The procedure was almost the same as that mentioned above for 3D-COF-1 synthesis. A centrifuge tube (5 mL) was charged with tetrakis(4-formylphenyl)-methane (TFPM) (21.6 mg, 0.05 mmol) and 4,4'-azodianiline (Azo) (21.2 mg, 0.1 mmol) in ChCl/gly (200  $\mu$ L) with acetic acid (6M, 8  $\mu$ L) as the catalyst, followed by keeping at 50°C for 24 hours to produce crystalline solids. The obtained yellow precipitate was isolated by filtration and washed with acetone (20 mL  $\times$  3) and ethanol (20 mL  $\times$  3). The 3D-COF-HNU10 was obtained after drying at 100°C under vacuum for 10 h (yield of 69%).

## Section S2: Figures

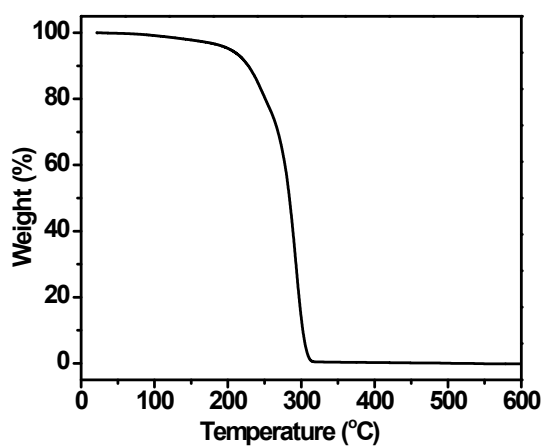

**Figure S1.** TGA curve of ChCl-Gly (1:2).

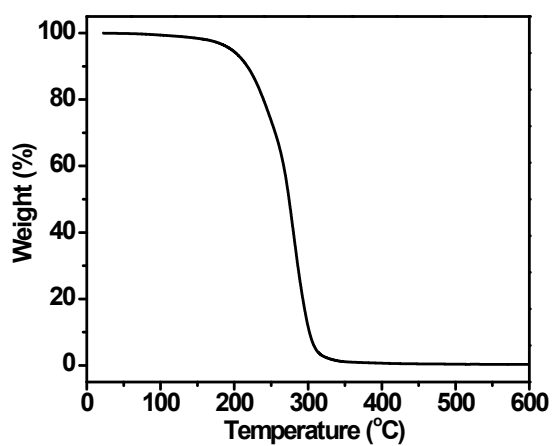

**Figure S2.** TGA curve of ChCl-U (1:2).

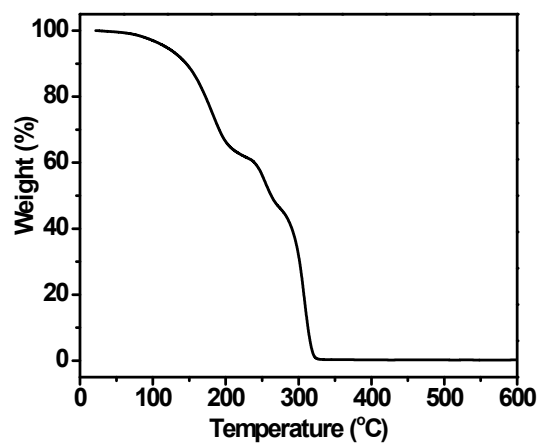

**Figure S3.** TGA curve of ChCl-EG (1:2).

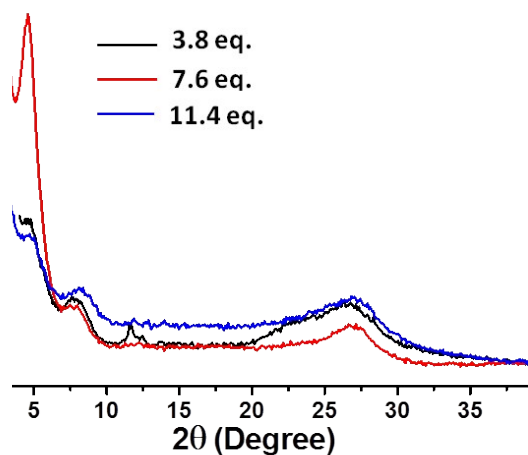

**Figure S4.** XRD patterns of the TpPa-Gly synthesized in ChCl/Gly with different equivalents with respect to Tp.

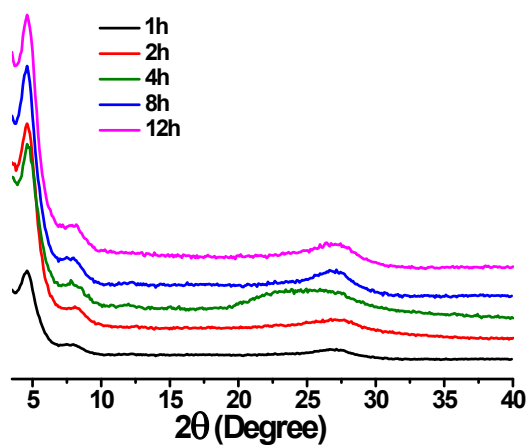

**Figure S5.** PXRD patterns of TpPa-Gly prepared in ChCl/Gly with different reaction time.

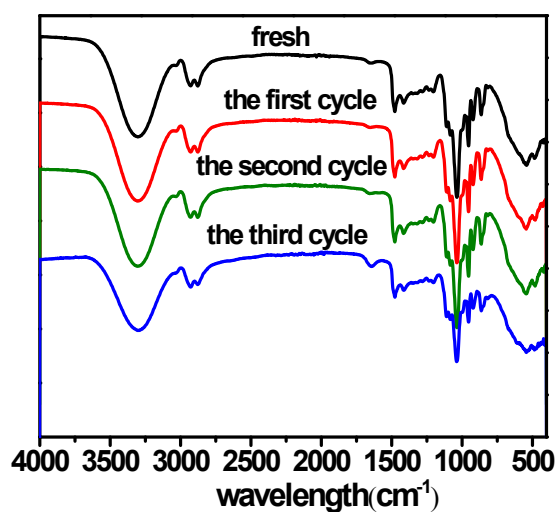

**Figure S6.** FT-IR spectra of ChCl-Gly (1:2) before and after each cycle.

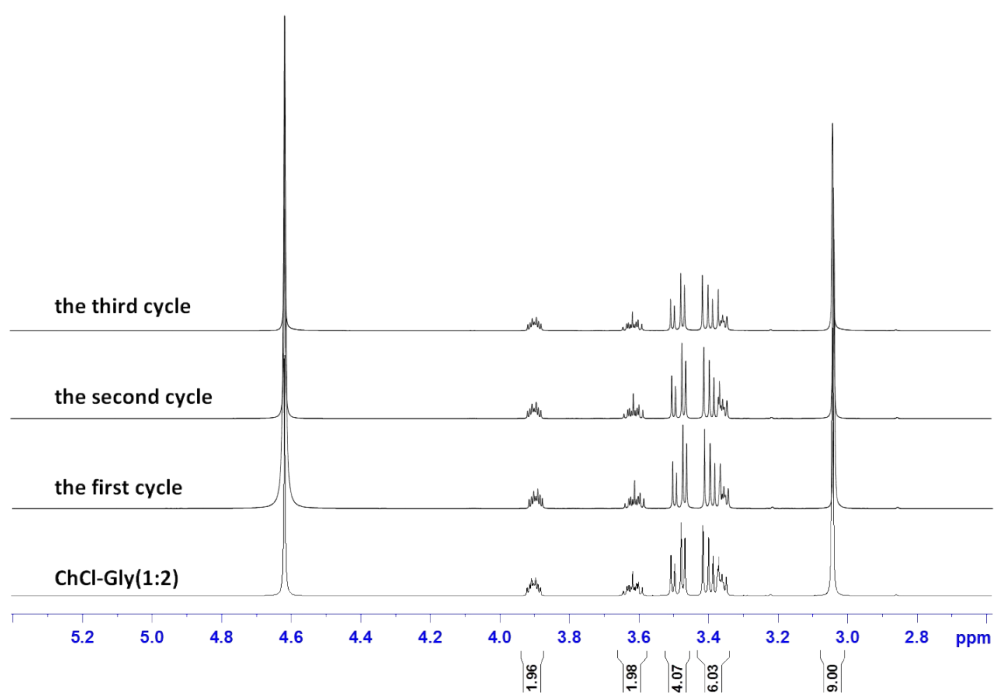

**Figure S7.**  $^1\text{H}$  NMR spectra of ChCl-Gly (1:2) before and after each cycle.

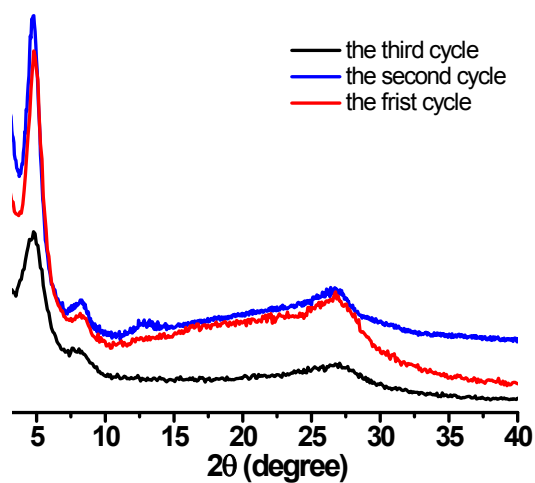

**Figure S8.** PXRD patterns of the recovered TpPa-Gly.

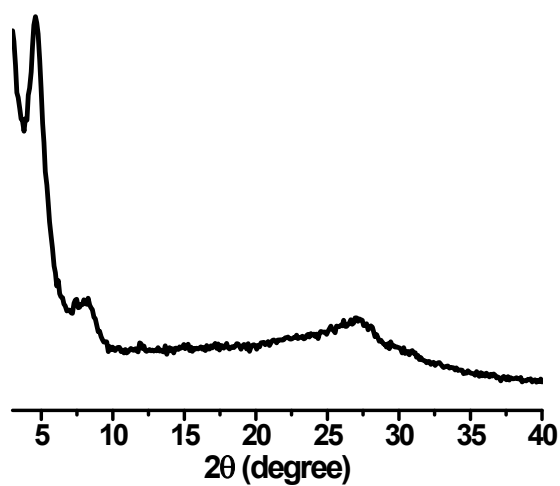

**Figure S9.** PXRD pattern of TpPa-Gly based on scale-up (1.6 g) synthesis by enlarging the amounts of reactants and solvents.

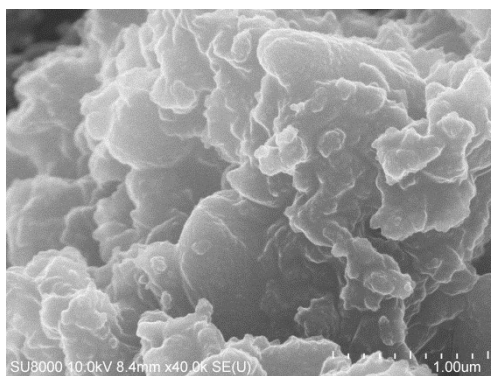

**Figure S10.** SEM images of the TpPa-Gly.

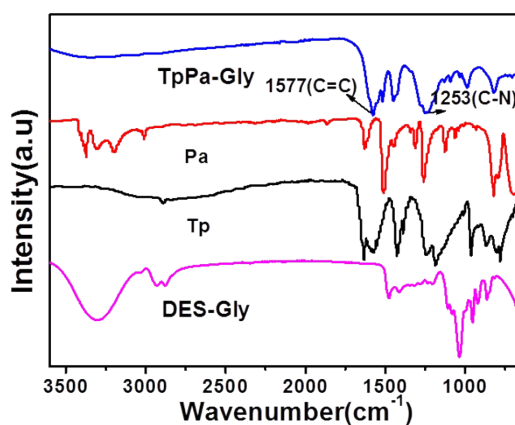

**Figure S11.** Comparison of the FT-IR spectra of TpPa-Gly with the precursor compounds Tp and Pa, and ChCl-Gly.

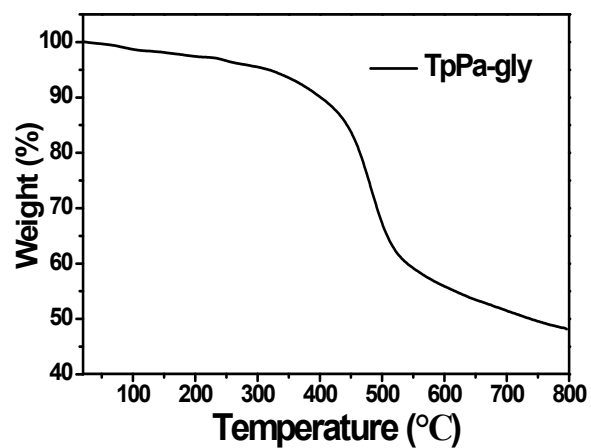

**Figure S12.** TGA curve of TpPa-Gly.

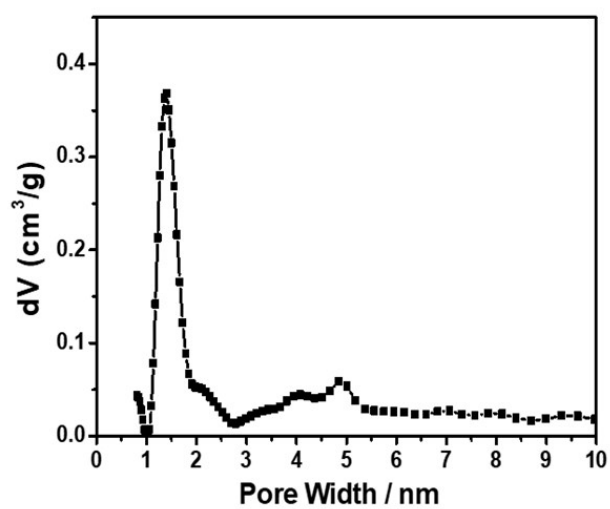

**Figure S13.** The pore-size distribution of TpPa-Gly estimated by NLDFT.

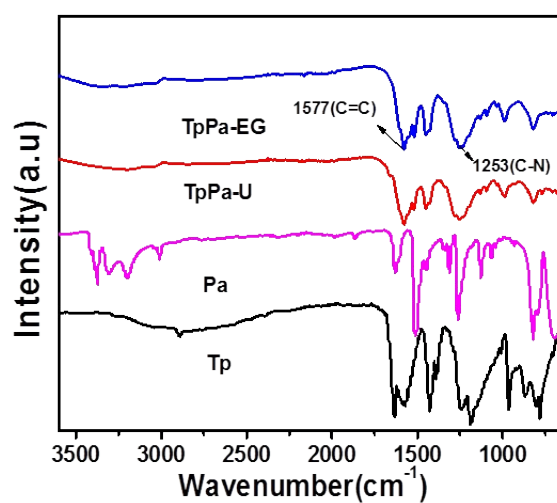

**Figure S14.** FT-IR spectra of the TpPa-EG (blue) and TpPa-U (red).

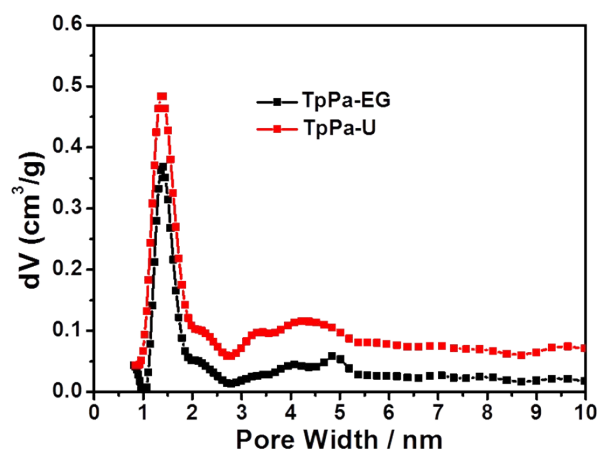

**Figure S15.** DFT pore size distribution for TpPa-EG and TpPa-U.

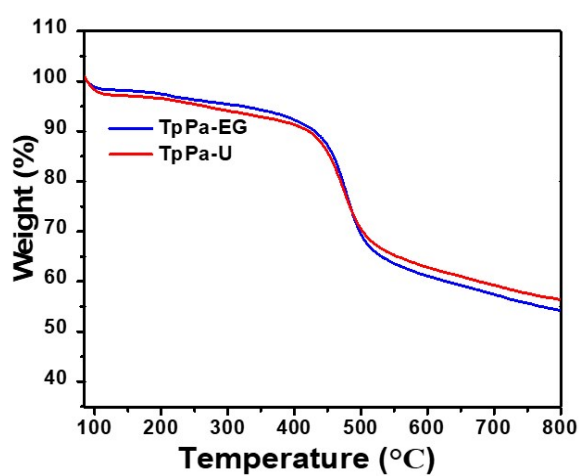

**Figure S16.** TGA curve for TpPa-EG (blue) and TpPa-U (red) under N<sub>2</sub> atmosphere to show the high thermal stability.

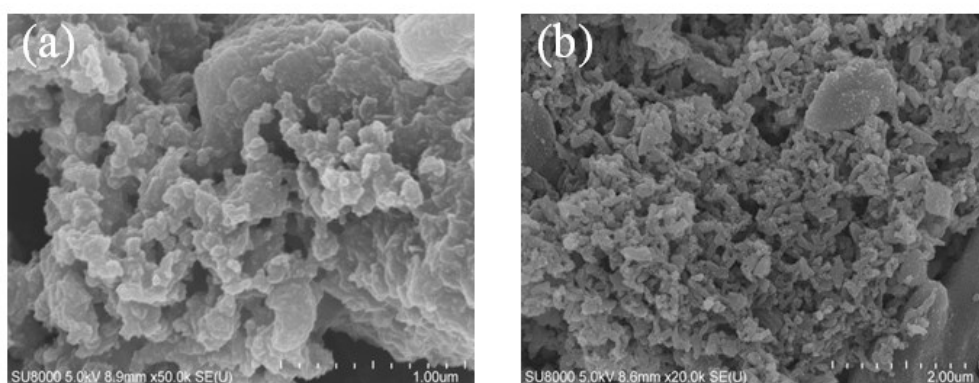

**Figure S17.** SEM images of the TpPa-EG (a) and TpPa-U (b).

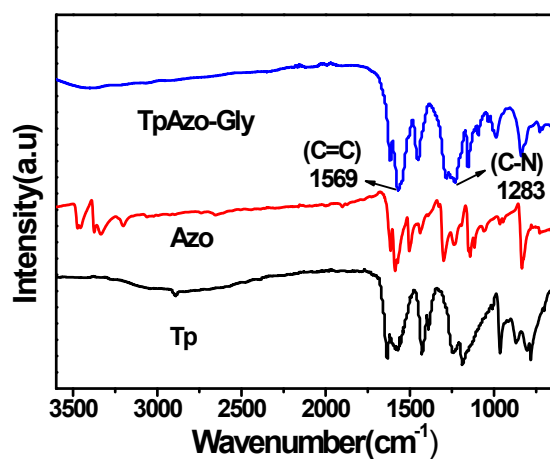

**Figure S18.** FT-IR spectra of TpAzo-Gly (blue).

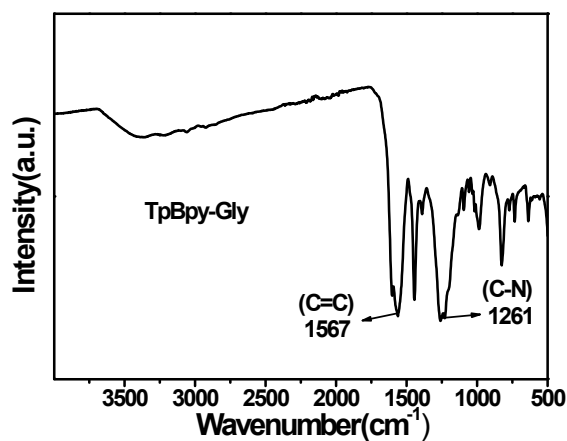

**Figure S19.** FT-IR spectra of TpBpy-Gly.

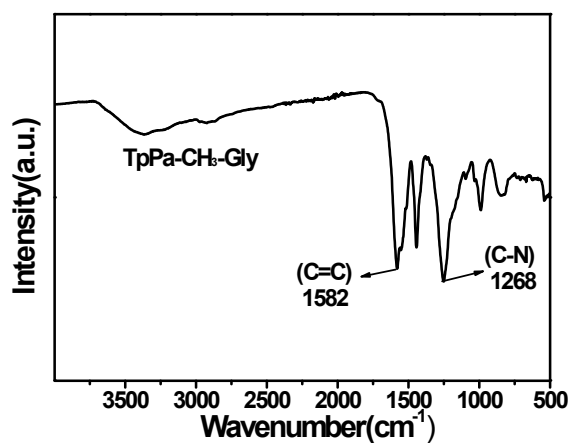

**Figure S20.** FT-IR spectra of TpPa-CH<sub>3</sub>-Gly.

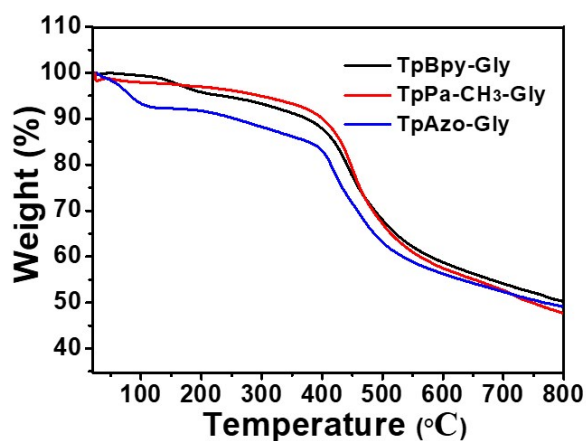

**Figure S21.** TGA curves of TpAzo-Gly (blue), TpBpy-Gly (black) and TpPa-CH<sub>3</sub>-Gly (red) under N<sub>2</sub> atmosphere to show the high thermal stability.

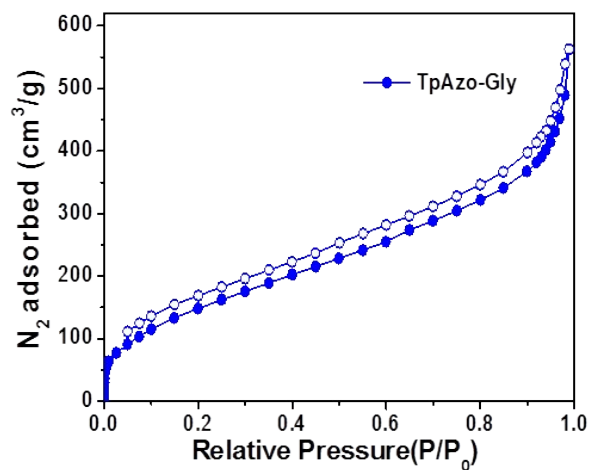

**Figure S22.** N<sub>2</sub> adsorption-desorption isotherms of TpAzo-Gly.

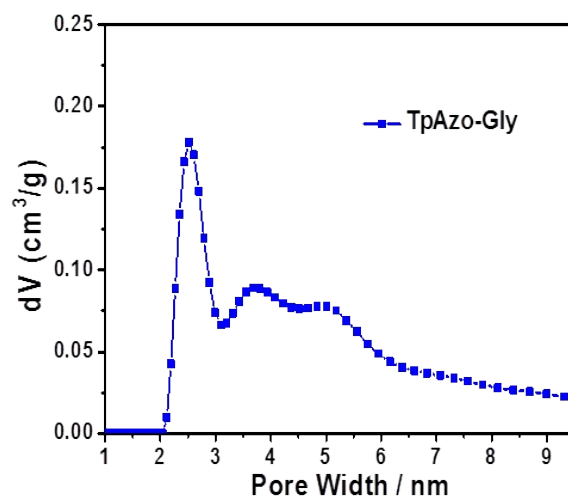

**Figure S23.** Pore-size distribution of TpAzo-Gly.

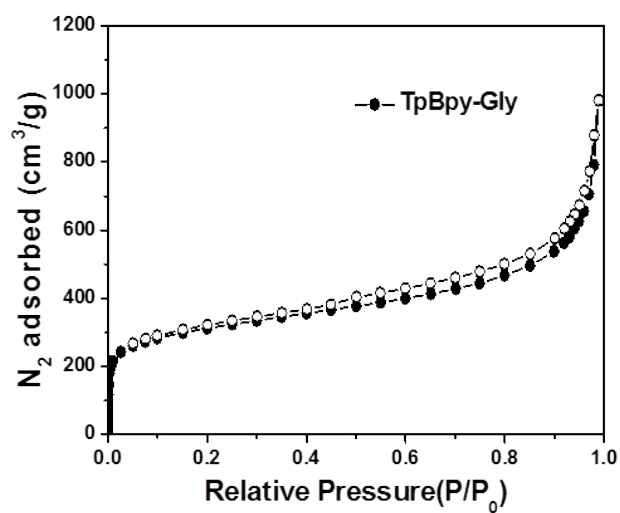

**Figure S24.**  $N_2$  adsorption-desorption isotherms of TpBpy-Gly.

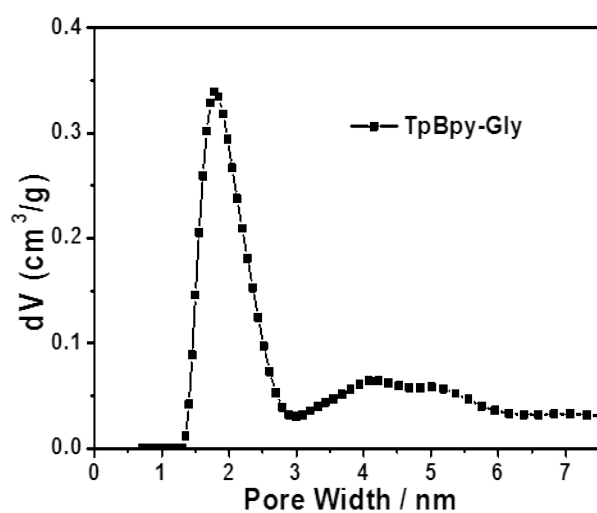

**Figure S25.** Pore-size distribution of TpBpy-Gly.

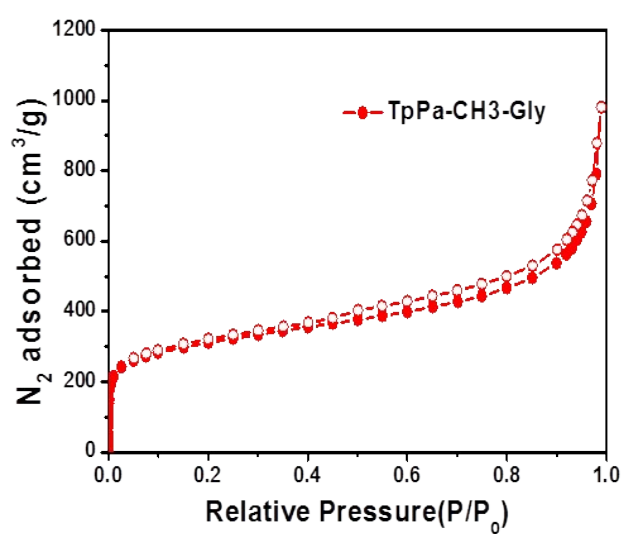

**Figure S26.**  $N_2$  adsorption-desorption isotherms of TpPa-CH<sub>3</sub>-Gly.

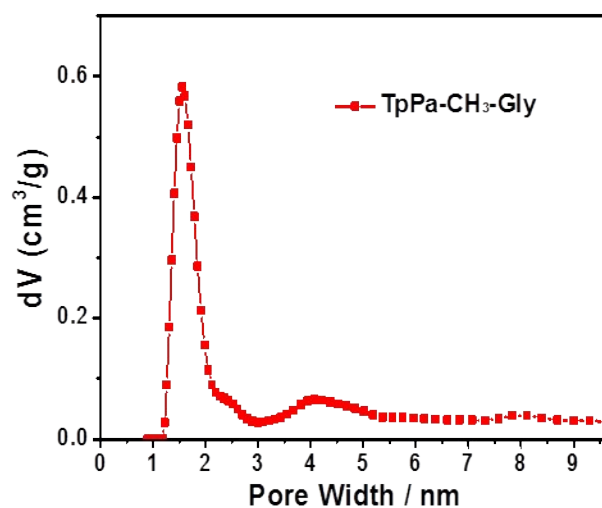

**Figure S27.** Pore-size distribution of TpPa-CH<sub>3</sub>-Gly.

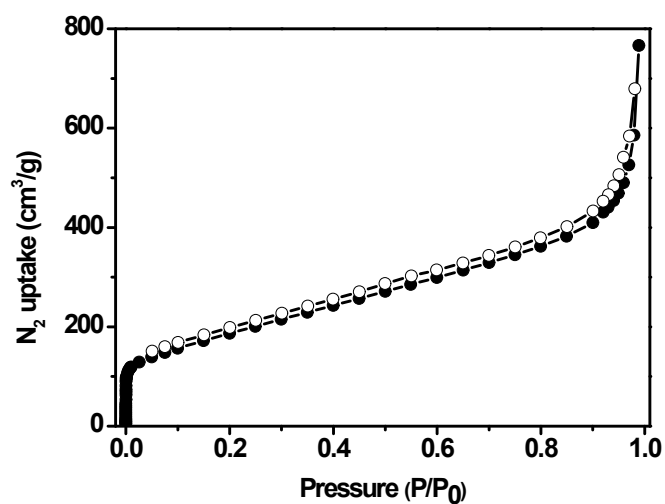

**Figure S28.** N<sub>2</sub> adsorption and desorption isotherms of TpHa-Gly.

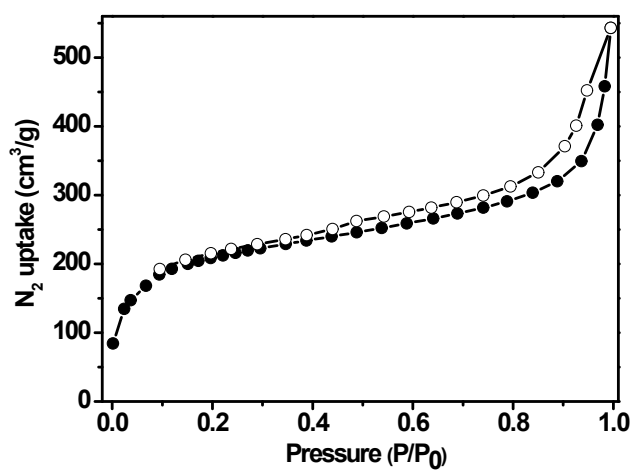

**Figure S29.** N<sub>2</sub> adsorption and desorption isotherms of TpDTPH-Gly.

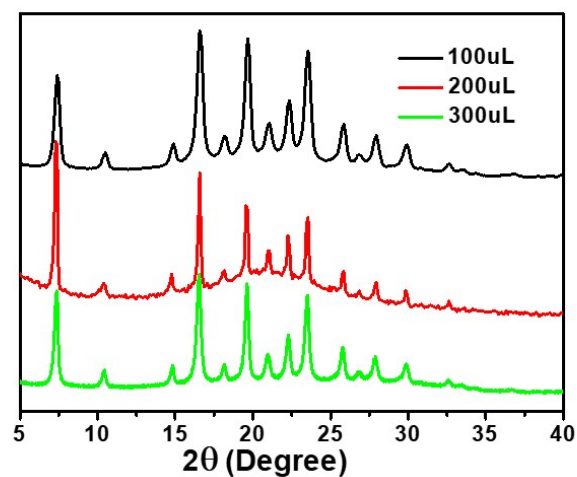

**Figure S30.** PXRD patterns of 3D-COF-1 prepared by using different amounts of ChCl/Gly.

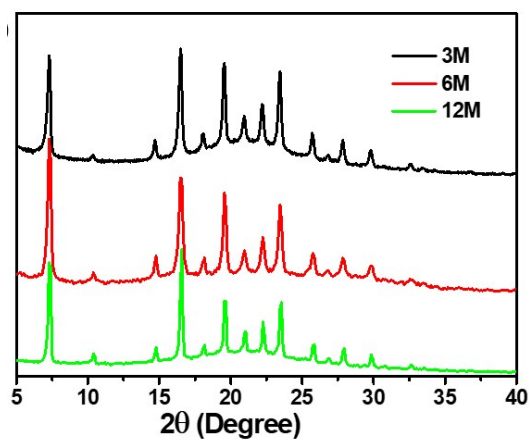

**Figure S31.** PXRD patterns of 3D-COF-1 prepared in the presence of aqueous 3M HOAc (black), 6 M HOAc (red), and 12 M HOAc (green) under ambient conditions.

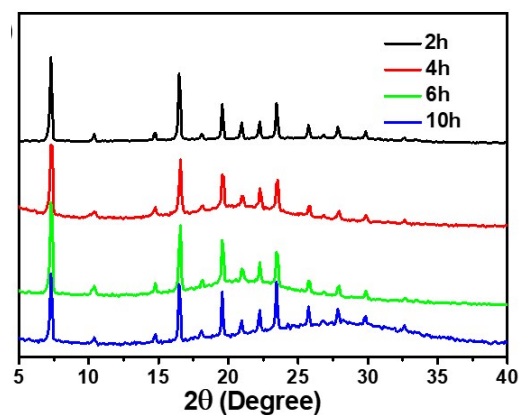

**Figure S32.** PXRD patterns of 3D-COF-1 prepared in ChCl/Gly with different reaction time.

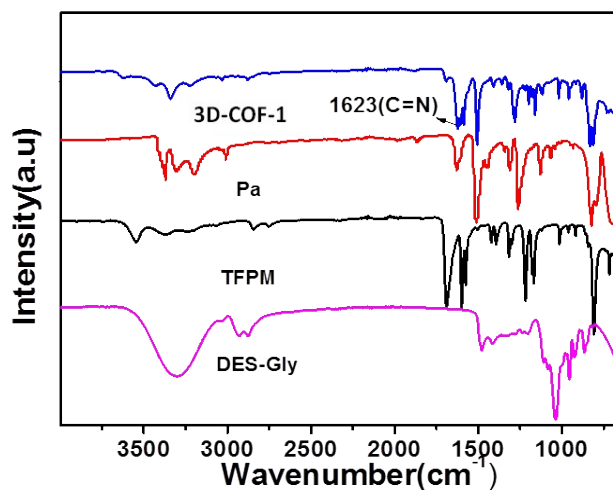

**Figure S33.** Comparison of the FT-IR spectra of 3D-COF-1 with the precursor compounds Pa and TFPM.

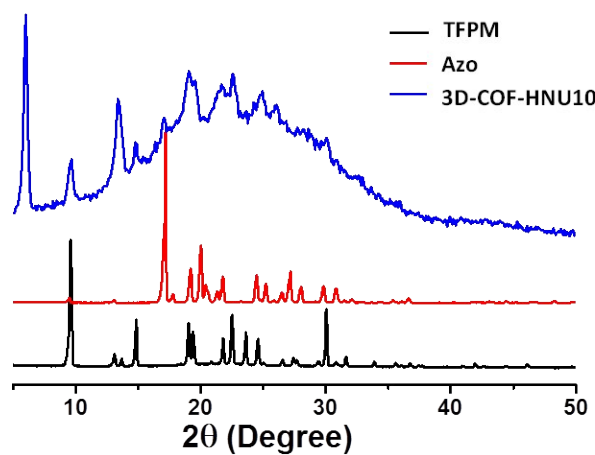

**Figure S34.** Comparison of the PXRD of 3D-COF-HNU10 with the precursor compounds Azo and TFPM.

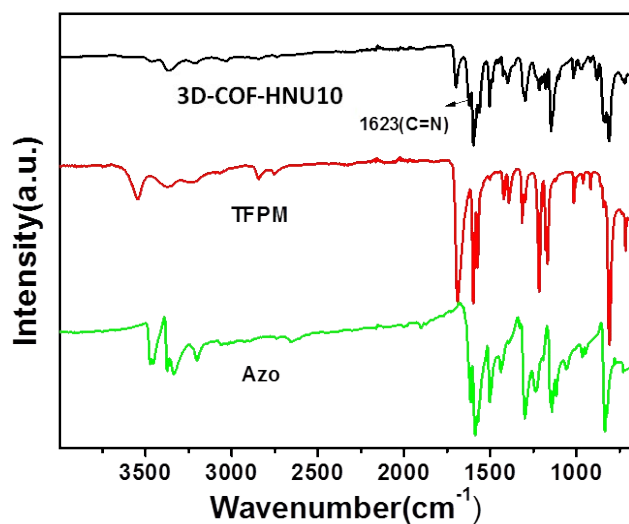

**Figure S35.** Comparison of the FT-IR spectra of 3D-COF-HNU10 with the precursor compounds Azo and TFPM.

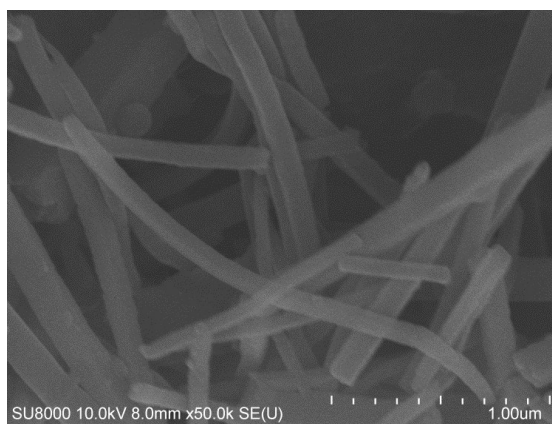

**Figure S36.** SEM images of 3D-COF-HNU10.

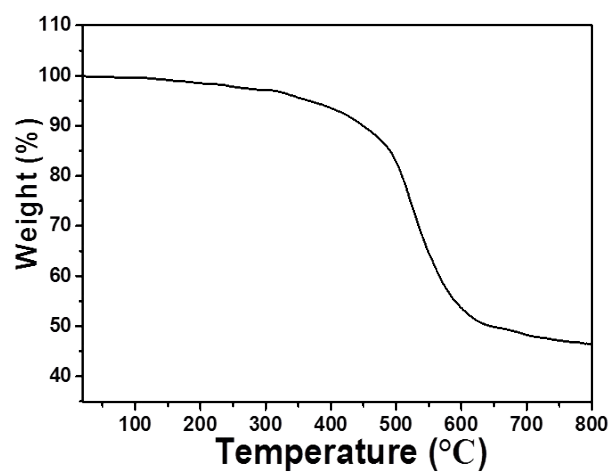

**Figure S37.** TGA curve of 3D-COF-HNU10 under N<sub>2</sub> atmosphere to show the high thermal stability.

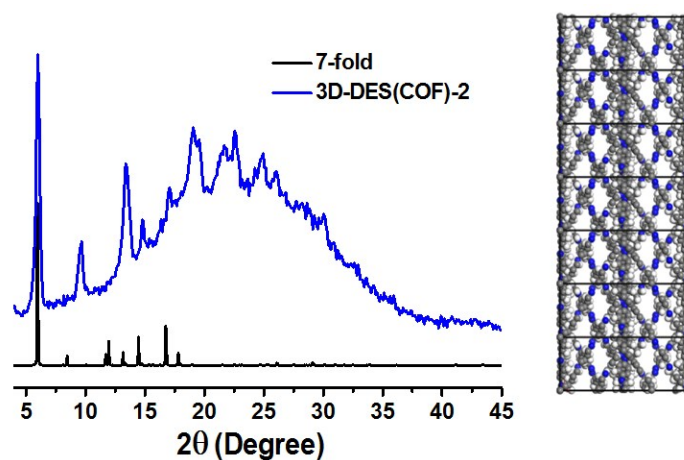

**Figure S38.** The calculated PXRD pattern of 3D-COF-HNU10 based on the 7-fold interpenetrated diamond net. 118P-4N<sub>2</sub>,  $a=b=29.635241\text{\AA}$ ,  $c=11.74474\text{\AA}$ ,  $\alpha=\beta=\gamma=90^\circ$ .

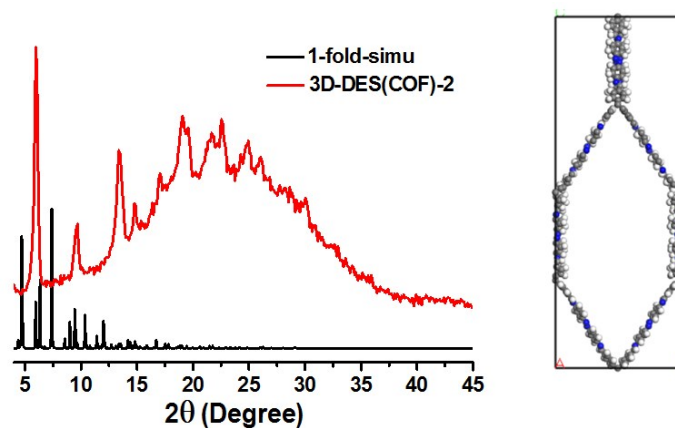

**Figure S39.** The calculated PXRD pattern of 3D-COF-HNU10 based on the 1-fold interpenetrated diamond net. 118P-4N2,  $a=b=29.677974\text{\AA}$ ,  $c=82.698616\text{\AA}$ ,  $\alpha=\beta=\gamma=90^\circ$ .

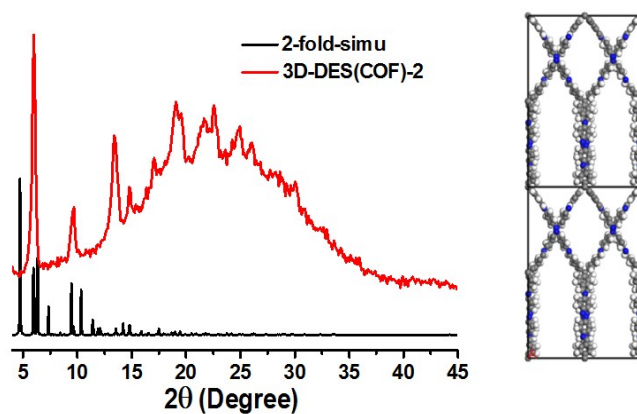

**Figure S40.** The calculated PXRD pattern of 3D-COF-HNU10 based on the 2-fold interpenetrated diamond net. 117P-4B2,  $a=b=29.716863\text{\AA}$ ,  $c=41.16785$ ,  $\alpha=\beta=\gamma=90^\circ$ .

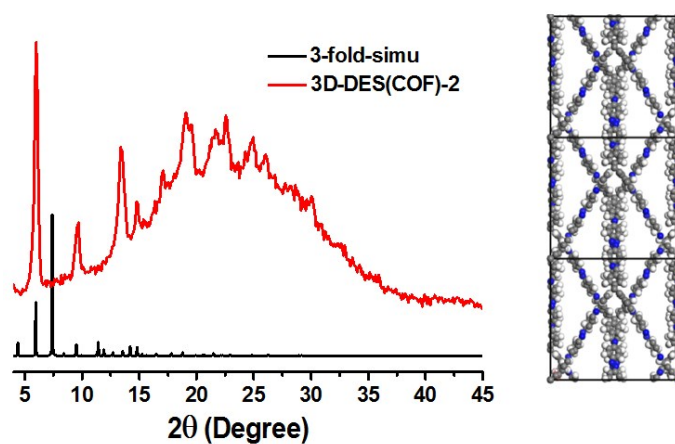

**Figure S41.** The calculated PXRD pattern of 3D-COF-HNU10 based on the 3-fold interpenetrated diamond net. 118P-4N2,  $a=b=29.755285\text{\AA}$ ,  $c=27.40066\text{\AA}$ ,  $\alpha=\beta=\gamma=90^\circ$ .

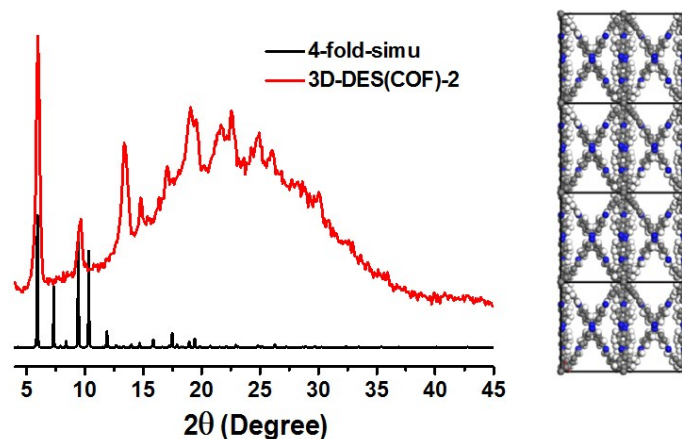

**Figure S42.** The calculated PXRD pattern of 3D-COF-HNU10 based on the 4-fold interpenetrated diamond net. 117P-4B2,  $a=b=29.770039\text{\AA}$ ,  $c=20.53345\text{\AA}$ ,  $\alpha=\beta=\gamma=90^\circ$ .

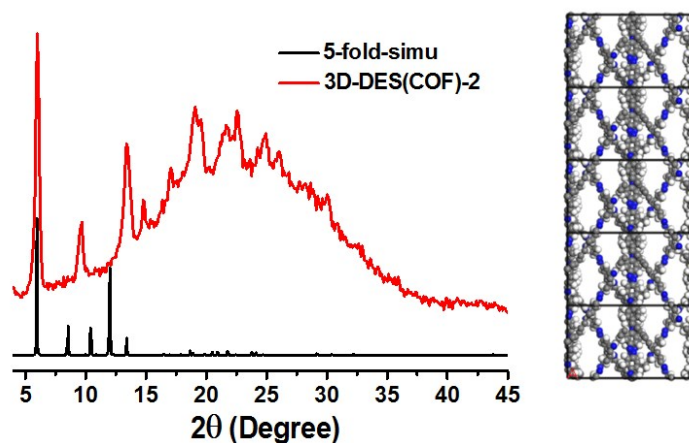

**Figure S43.** The calculated PXRD pattern of 3D-COF-HNU10 based on the 5-fold interpenetrated diamond net. 118P-4N2,  $a=b=29.761953\text{\AA}$ ,  $c=16.42007\text{\AA}$ ,  $\alpha=\beta=\gamma=90^\circ$ .

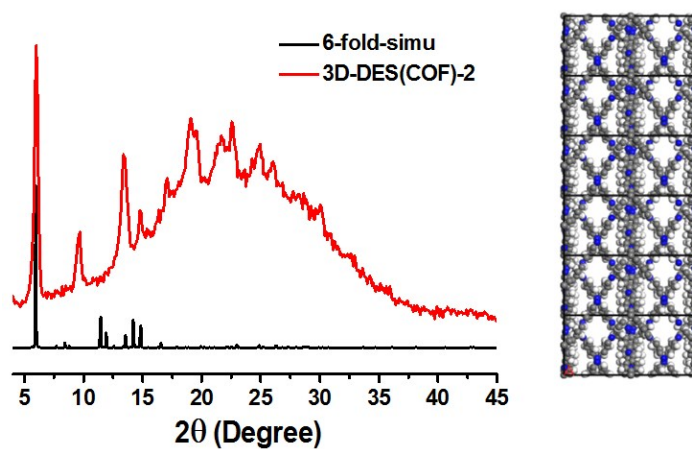

**Figure S44.** The calculated PXRD pattern of 3D-COF-HNU10 based on the 6-fold interpenetrated diamond net. 117P-4B2,  $a=b=29.714523\text{\AA}$ ,  $c=13.69055\text{\AA}$ ,  $\alpha=\beta=\gamma=90^\circ$ .

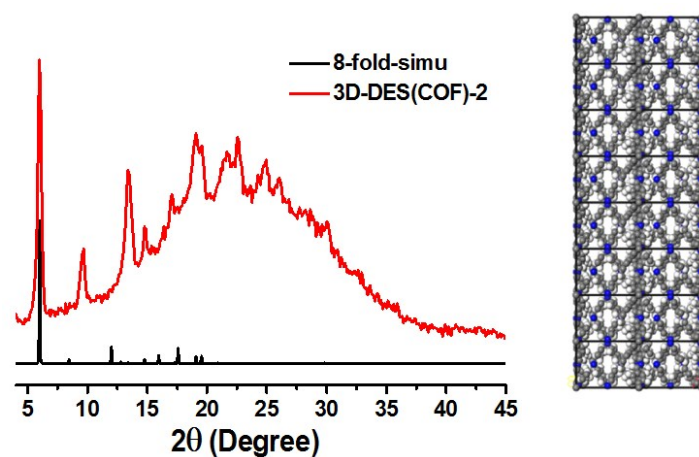

**Figure S45.** The calculated PXRD pattern of 3D-COF-HNU10 based on the 8-fold interpenetrated diamond net. 117P-4B2,  $a=b=29.531112\text{\AA}$ ,  $c=10.28493\text{\AA}$ ,  $\alpha=\beta=\gamma=90^\circ$ .

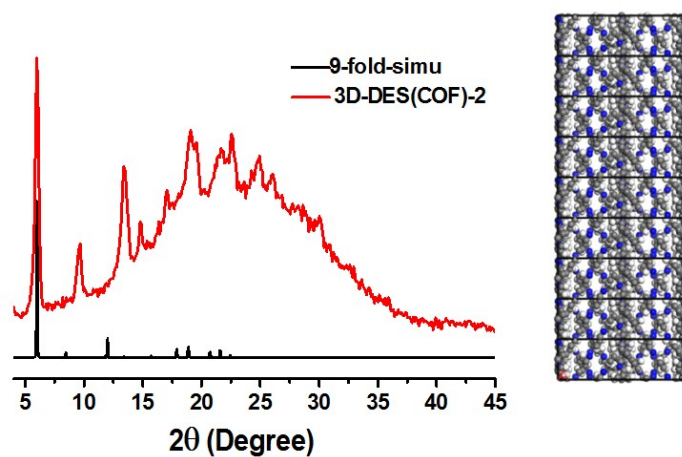

**Figure S46.** The calculated PXRD pattern of 3D-COF-HNU10 based on the 9-fold interpenetrated diamond net. 118P-4N2,  $a=b=29.532956\text{\AA}$ ,  $c=9.144992\text{\AA}$ ,  $\alpha=\beta=\gamma=90^\circ$ .

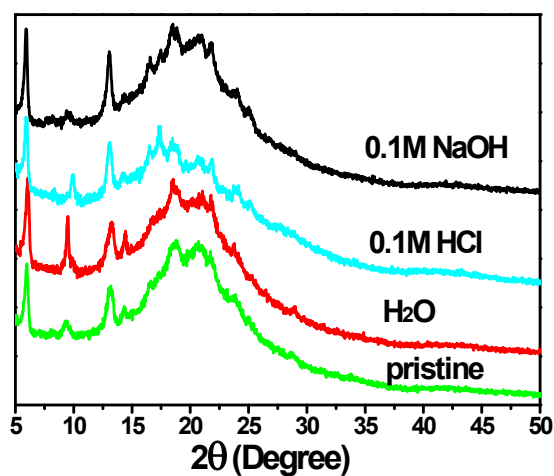

**Figure S47.** PXRD patterns of 3D-COF-HNU10 immersed in hot water, 0.1M HCl or 0.1M NaOH for 72 h.

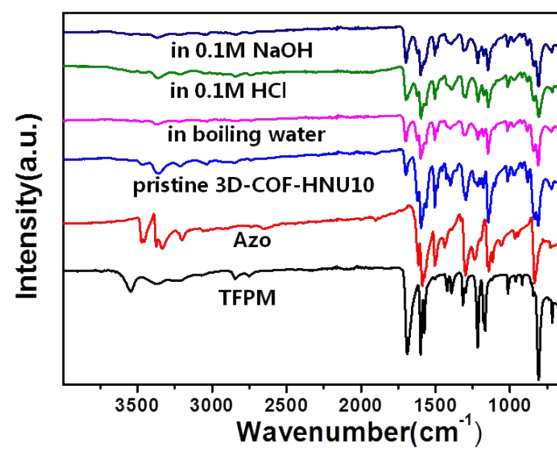

**Figure S48.** FTIR spectra of 3D-COF-HNU10 before and after 3-day immersed in boiling water, 0.1 M HCl, and 0.1 M NaOH, respectively.

## Section S3: Tables

**Table S1.** The viscosity and thermal decomposition temperature of the DESs used in this work.

| Enrty | DES            | Viscosity/mPa.s           | Decomposition temperature/ °C |
|-------|----------------|---------------------------|-------------------------------|
| 1     | ChCl-Gly (1:2) | 259 (25°C) <sup>[2]</sup> | 210                           |
| 2     | ChCl-U (1:2)   | 750 (25°C) <sup>[2]</sup> | 200                           |
| 3     | ChCl-EG (1:2)  | 37 (25°C) <sup>[2]</sup>  | 140                           |

**Table S2.** The yield and material properties of the synthesized 2D and 3D COFs prepared by the conventional solvothermal method and present method

| Entry | COF                  | Yield /% | BET surface area/ m <sup>2</sup> /g | Pore size /nm | Ref.                                      |
|-------|----------------------|----------|-------------------------------------|---------------|-------------------------------------------|
| 1     | TpPa                 | 91       | 747                                 | 1.4           | This work                                 |
|       |                      | 80       | 535                                 | 1.25          | <i>J. Am. Chem. Soc.</i> 2012, 134, 19524 |
| 2     | TpPa-CH <sub>3</sub> | 88       | 1330                                | 1.5           | This work                                 |
|       |                      | 82       | 339                                 | 1.35          | <i>J. Am. Chem. Soc.</i> 2012, 134, 19524 |
| 3     | TpAzo                | 85       | 573                                 | 2.3           | This work                                 |
|       |                      | 75       | 1328                                | 2.5           | <i>J. Am. Chem. Soc.</i> 2014, 136, 6570  |
| 4     | TpBpy                | 83       | 955                                 | 1.9           | This work                                 |
|       |                      | ---      | 1660                                | 2.1           | <i>Chem. Mater.</i> 2016, 28, 4375        |
| 5     | TpHa                 | 90       | 671                                 | 0.6           | This work                                 |
|       |                      | --       | 415                                 | 0.9           | <i>Chem. Mater.</i> 2016, 28, 1277        |
| 6     | TpDTPH               | 80       | 796                                 | 0.7-1.5       | This work                                 |
|       |                      | --       | 757                                 | 2.1           | <i>Chem. Mater.</i> 2016, 28, 1277        |
| 7     | 3D-COF-1             | 73       | 511                                 | 1.7, 5        | This work                                 |
|       |                      | 80       | 596                                 | --            | <i>J. Am. Chem. Soc.</i> 2018, 140, 4494  |
| 8     | 3D-COF-HNU10         | 69       | 309                                 | 1.7, 5        | This work                                 |
|       |                      | --       | --                                  | --            | solvothermal method                       |

**Table S3.** Unit cell parameters and fractional atomic coordinates for 3D-COF-1 based on the 5-interpenetrated diamond net<sup>3</sup>

| Space group          |        | $I4_1/a$                                                                                   |         |
|----------------------|--------|--------------------------------------------------------------------------------------------|---------|
| Calculated unit cell |        | $a = b = 23.6865 \text{ \AA}, c = 13.3002 \text{ \AA}, \alpha = \beta = \gamma = 90^\circ$ |         |
| atoms                | x      | y                                                                                          | Z       |
| C1                   | 0.4499 | 0.7218                                                                                     | 0.6044  |
| C2                   | 0.4936 | 0.714                                                                                      | 1.53114 |
| N3                   | 0.484  | 0.67849                                                                                    | 1.43836 |
| C4                   | 0.5441 | 0.7442                                                                                     | 1.5553  |
| C5                   | 0.5195 | 0.6658                                                                                     | 1.3615  |
| C6                   | 0.5096 | 0.6273                                                                                     | 1.2650  |
| C7                   | 0.5547 | 0.6176                                                                                     | 1.1960  |
| C8                   | 0.5508 | 0.5816                                                                                     | 1.108   |
| C9                   | 0.500  | 0.55273                                                                                    | 1.0798  |
| C10                  | 0.4550 | 0.5628                                                                                     | 1.1490  |
| C11                  | 0.459  | 0.5988                                                                                     | 1.2372  |
| H12                  | 0.4081 | 0.7005                                                                                     | 0.5937  |
| H13                  | 0.5815 | 0.7419                                                                                     | 1.5035  |
| H14                  | 0.5633 | 0.6837                                                                                     | 1.3595  |
| H15                  | 0.5966 | 0.6385                                                                                     | 1.20811 |
| H16                  | 0.5886 | 0.5752                                                                                     | 1.0589  |
| H17                  | 0.4129 | 0.5422                                                                                     | 1.1365  |
| H18                  | 0.42   | 0.60371                                                                                    | 1.28432 |
| C19                  | 0      | 0.5                                                                                        | 0.75    |

**Table S4.** Unit cell parameters and fractional atomic coordinates for 3D-COF-10 based on the 7-interpenetrated diamond net

| Space group          | P-4N2                                                               |         |          |
|----------------------|---------------------------------------------------------------------|---------|----------|
| Calculated unit cell | a=b=29.635241 Å c=11.744742 Å, $\alpha = \beta = \gamma = 90^\circ$ |         |          |
| atoms                | x                                                                   | y       | z        |
| C1                   | 0.94137                                                             | 0.46325 | 3.88606  |
| C2                   | 0.19364                                                             | 0.46745 | 4.30777  |
| C3                   | 0.12797                                                             | 0.48210 | 4.12331  |
| C4                   | 0.09972                                                             | 0.48955 | 4.02161  |
| C5                   | 0.08227                                                             | 0.45132 | 3.96824  |
| C6                   | 0.05243                                                             | 0.45542 | 3.87822  |
| C7                   | 0.04035                                                             | 0.49801 | 3.83327  |
| H8                   | 0.19457                                                             | 0.44066 | 4.24560  |
| H9                   | 0.13387                                                             | 0.44737 | 4.14721  |
| H10                  | 0.09018                                                             | 0.41783 | 3.99954  |
| H11                  | 0.03732                                                             | 0.42467 | 3.84627  |
| C12                  | 0.21832                                                             | 0.46159 | 4.40806  |
| C13                  | 0.22023                                                             | 0.49588 | 4.48921  |
| H14                  | 0.23666                                                             | 0.43052 | 4.42242  |
| C15                  | 0.17152                                                             | 0.54215 | 4.36963  |
| C16                  | 0.16941                                                             | 0.50775 | 4.28818  |
| N17                  | 0.14273                                                             | 0.51475 | 4.18714  |
| C18                  | 0.08811                                                             | 0.53252 | 3.97973  |
| H19                  | 0.15329                                                             | 0.57328 | 4.35524  |
| H20                  | 0.04835                                                             | 0.57008 | 3.85879  |
| H21                  | 0.10074                                                             | 0.56251 | 4.02169  |
| C22                  | 0.19671                                                             | 0.53636 | 4.46972  |
| H23                  | 0.19809                                                             | 0.56325 | 4.53192  |
| C24                  | 0.47291                                                             | 0.36547 | -1.14323 |
| C25                  | 0.48166                                                             | 0.39645 | -1.23897 |
| C26                  | 0.44661                                                             | 0.40594 | -1.31528 |
| C27                  | 0.45248                                                             | 0.43736 | -1.40253 |
| C28                  | 0.49424                                                             | 0.45948 | -1.41801 |
| H29                  | 0.44090                                                             | 0.34818 | -1.14305 |
| H30                  | 0.41388                                                             | 0.39022 | -1.30463 |
| H31                  | 0.42331                                                             | 0.44559 | -1.45360 |
| N32                  | 0.24707                                                             | 0.48904 | 4.58909  |
| C33                  | 0.44889                                                             | 0.47037 | 5.34161  |
| C34                  | 0.41786                                                             | 0.47657 | 5.25329  |
| H35                  | 0.46624                                                             | 0.43828 | 5.34811  |
| H36                  | 0.41136                                                             | 0.44917 | 5.19443  |
| N37                  | 0.50176                                                             | 0.36030 | -1.06064 |

|     |         |         |          |
|-----|---------|---------|----------|
| C38 | 0.45498 | 0.30951 | -0.93789 |
| H39 | 0.42610 | 0.31169 | -0.99323 |
| C40 | 0.45077 | 0.28308 | -0.83998 |
| C41 | 0.48652 | 0.27918 | -0.76347 |
| N42 | 0.48034 | 0.25199 | -0.66400 |
| H43 | 0.41946 | 0.26557 | -0.82281 |
| C44 | 0.53138 | 0.32880 | -0.88370 |
| C45 | 0.49563 | 0.33249 | -0.96127 |
| H46 | 0.56260 | 0.34663 | -0.90011 |
| C47 | 0.52701 | 0.30229 | -0.78532 |
| H48 | 0.55490 | 0.29970 | -0.72620 |
| C49 | 0.50000 | 0.00000 | 0.25000  |
| C50 | 0.50000 | 0.50000 | -1.50000 |

**Table S5** Synthesis of 3D-COF-HNU10 by the polymerization of TFPM (0.1 mmol, 1 equiv) and Azo (0.2 mmol, 2 equiv) at different reaction conditions<sup>a</sup>.

| Solvents                                   | AcOH      | Product      | PXRD     |
|--------------------------------------------|-----------|--------------|----------|
| Dioxane : mesitylene<br>(1mL : 1mL )       | 0.2mL/ 6M | yellow solid | No peaks |
| Dioxane : mesitylene<br>(0.5 mL:0.5 mL)    | 0.1mL/ 3M | yellow solid | No peaks |
| Dioxane : mesitylene<br>(1.5 mL: 0.5 mL)   | 0.1mL/ 6M | yellow solid | No peaks |
| Dioxane (2 mL)                             | 0.1mL/ 6M | No product   | —        |
| Dioxane (1 mL)                             | 0.1mL/ 3M | No product   | —        |
| DMAC : o-DCB<br>(1 mL: 1 mL)               | 0.1mL/ 6M | No product   | —        |
| DMAC : o-DCB<br>(1.5 mL: 0.5 mL)           | 0.2mL/ 6M | No product   | —        |
| BmimTf <sub>2</sub> N (100uL) <sup>b</sup> | 0         | No product   | —        |
| BmimTf <sub>2</sub> N (100uL) <sup>b</sup> | 8uL AcOH  | yellow solid | No peaks |

Reaction conditions: a, 120°C, 3days in sealed tubes. b, 25°C, 12 h in an open system.

## Section S4: References

- [1] Abbott A. P., Boothby D., Capper G., et al. Deep Eutectic Solvents Formed between Choline Chloride and Carboxylic Acids: Versatile Alternatives to Ionic Liquids. *J. Am. Chem. Soc.*, **2004**, 126, 9142-9147.
- [2] C. D'Agostino, R. C. Harris, A. P. Abbott, L. F. Gladdena, M. D. Mantle, *Phys. Chem. Chem. Phys.*, **2011**, 13, 21383-21391.
- [3] Guan X., Ma Y., Li H., Yusran Y., Xue M., Fang Q., Yan, Y., Valtchev V., Qiu S., Fast, Ambient Temperature and Pressure Ionothermal Synthesis of Three-Dimensional Covalent Organic Frameworks. *J. Am. Chem. Soc.*, **2018**, 140, 4494-4498.
